# Supplementary material for: The global potential for natural regeneration in deforested tropical regions
Source: Research Square preprint supplement (doi:10.21203/rs.3.rs-3235955/v1), 2023-08-10
Supplement: Supplementary file 1 [file 830f590cf8ff314c9d3f83fe.docx]

## Appendix 2. Table of data used in the analysis

| **Name** | **Use in analysis** | **Source** |
| --- | --- | --- |
| Patches of natural regeneration | Used as sample locations | 1 |
| ESA CCI land cover | To delineate areas available for natural regeneration and as predictor variables (cropland density and distance to urban area) | 2 |
| Tree cover | Predictor variables (forest density and distance to forest patch variables) | 3 |
| Protected areas | Predictor variable | 4 |
| Biomes | To delineate areas available for natural regeneration and as a predictor variable | 5 |
| Global Soil Map (International Soil Reference and Information Centre) | Predictor variables | 6 |
| Slope (derived from SRTM elevation) | Predictor variable | 7 |
| Net Primary Productivity (Annual 2000-2015, global; MOD17A3) | Predictor variable | 8 |
| WorldClim version 2.1 climate data for 1970-2000 | Predictor variable | 9 |
| Global Human Settlement dataset (GHS-POP) | Predictor variable | 10 |
| Gross Domestic Product and Human Development Index | Predictor variable | 11 |
| Road density | Predictor variable | 12 |
| Fire: burned area | Predictor variable | 13 |
| Distance to water | Predictor variable | 14 |
| GADM Country dataset | Used for all country-based summaries in this analysis. | 15 |

## References

1. Fagan, M. E. *et al.* The expansion of tree plantations across tropical biomes. *Nat. Sustain.* **5**, 681–688 (2022).

2. ESA. Land Cover CCI Product User Guide Version 2. Tech. Rep. (2017).

3. Hansen, M. C. *et al.* High-resolution global maps of 21st-century forest cover change. *Science* **342**, 850–853 (2013).

4. UNEP-WCMC & IUCN. Protected Planet: The World Database on Protected Areas (WDPA) Version 1.6. https://www.protectedplanet.net/en (2020).

5. Dinerstein, E. *et al.* An ecoregion-based approach to protecting half the terrestrial realm. *Bioscience* vol. 67 534–545 (2017).

6. Hengl, T. *et al.* SoilGrids250m: Global gridded soil information based on machine learning. *PLoS One* **12**, e0169748 (2017).

7. Farr, T. G. *et al.* The shuttle radar topography mission. *Rev. Geophys.* **45**, (2007).

8. Zhao, M., Heinsch, F. A., Nemani, R. R. & Running, S. W. Improvements of the MODIS terrestrial gross and net primary production global data set. *Remote Sens. Environ.* **95**, 164–176 (2005).

9. Fick, S. E. & Hijmans, R. J. WorldClim 2: new 1km spatial resolution climate surfaces for global land areas. *International Journal of Climatology* **37**, 4302–4315 (2017).

10. Schiavina, M., Freire, S. & MacManus, K. GHS population grid multitemporal (1975, 1990, 2000, 2015) R2019A. *European Commission, Joint Research Centre (JRC)* (2019).

11. Kummu, M., Taka, M. & Guillaume, J. H. A. Data from: Gridded global datasets for Gross Domestic Product and Human Development Index over 1990–2015, v2, Dryad, Dataset. (2020) doi:10.5061/dryad.dk1j0.

12. Meijer, J. R., Huijbregts, M. A. J., Schotten, K. C. G. J. & Schipper, A. M. Global patterns of current and future road infrastructure. *Environ. Res. Lett.* **13**, 064006 (2018).

13. Artés, T. *et al.* A global wildfire dataset for the analysis of fire regimes and fire behaviour. *Sci. Data* **6**, 296 (2019).

14. Kummu, M., de Moel, H., Ward, P. J. & Varis, O. How close do we live to water? A global analysis of population distance to freshwater bodies. *PLoS One* **6**, e20578 (2011).

15. GADM. Database of Global Administrative Areas. (2022).
