# Supplementary material for: The global potential for natural regeneration in deforested tropical regions
Source: Research Square preprint supplement (doi:10.21203/rs.3.rs-3235955/v1), 2023-08-10
Supplement: Supplementary file 2 [file df5f6f9c44fda43aafc49ebd.docx]

## Appendix 3. Table of potential for natural regeneration across all countries

| Country | Region | Available for restoration (M. ha) | PNR (M. ha) | Proportion available  for restoration with PNR |
| --- | --- | --- | --- | --- |
| Brazil | Neotropics | 591.40 | 43.71 | 0.07 |
| Indonesia | Indomalayan tropics | 181.39 | 29.26 | 0.16 |
| China | Indomalayan tropics | 67.27 | 15.54 | 0.23 |
| Mexico | Neotropics | 85.97 | 11.99 | 0.14 |
| Colombia | Neotropics | 93.78 | 11.19 | 0.12 |
| Vietnam | Indomalayan tropics | 31.17 | 7.36 | 0.24 |
| DRC | Afrotropics | 115.44 | 7.27 | 0.06 |
| Malaysia | Indomalayan tropics | 32.16 | 6.59 | 0.20 |
| Myanmar | Indomalayan tropics | 55.94 | 6.44 | 0.12 |
| Thailand | Indomalayan tropics | 50.34 | 6.43 | 0.13 |
| Philippines | Indomalayan tropics | 29.29 | 5.33 | 0.18 |
| Cuba | Neotropics | 9.33 | 4.55 | 0.49 |
| Laos | Indomalayan tropics | 23.13 | 4.47 | 0.19 |
| Madagascar | Afrotropics | 46.34 | 4.08 | 0.09 |
| Venezuela | Neotropics | 56.49 | 3.83 | 0.07 |
| Peru | Neotropics | 93.23 | 3.73 | 0.04 |
| Nicaragua | Neotropics | 10.42 | 3.38 | 0.32 |
| Bolivia | Neotropics | 58.16 | 3.22 | 0.06 |
| Papua New Guinea | Indomalayan tropics | 43.25 | 2.70 | 0.06 |
| Guatemala | Neotropics | 10.59 | 2.38 | 0.23 |
| Honduras | Neotropics | 10.33 | 2.22 | 0.22 |
| Côte d'Ivoire | Afrotropics | 14.99 | 2.16 | 0.14 |
| India | Indomalayan tropics | 153.81 | 2.15 | 0.01 |
| Cambodia | Indomalayan tropics | 18.13 | 2.11 | 0.12 |
| Ecuador | Neotropics | 22.49 | 1.99 | 0.09 |
| Dominican Republic | Neotropics | 4.66 | 1.49 | 0.32 |
| Liberia | Afrotropics | 9.49 | 1.45 | 0.15 |
| Mozambique | Afrotropics | 13.51 | 1.18 | 0.09 |
| Nigeria | Afrotropics | 12.71 | 1.15 | 0.09 |
| Cameroon | Afrotropics | 24.46 | 1.15 | 0.05 |
| Tanzania | Afrotropics | 8.49 | 1.14 | 0.13 |
| Panama | Neotropics | 7.11 | 1.12 | 0.16 |
| Costa Rica | Neotropics | 4.97 | 1.03 | 0.21 |
| Kenya | Afrotropics | 7.41 | 1.02 | 0.14 |
| Ghana | Afrotropics | 7.96 | 0.96 | 0.12 |
| Sri Lanka | Indomalayan tropics | 6.36 | 0.96 | 0.15 |
| Sierra Leone | Afrotropics | 4.71 | 0.84 | 0.18 |
| Haiti | Neotropics | 2.62 | 0.66 | 0.25 |
| Ethiopia | Afrotropics | 6.82 | 0.62 | 0.09 |
| Republic of Congo | Afrotropics | 23.24 | 0.57 | 0.02 |
| Guyana | Neotropics | 19.68 | 0.45 | 0.02 |
| Timor-Leste | Indomalayan tropics | 1.48 | 0.43 | 0.29 |
| Guinea | Afrotropics | 4.79 | 0.42 | 0.09 |
| Uganda | Afrotropics | 3.13 | 0.41 | 0.13 |
| Australia | Indomalayan tropics | 3.44 | 0.40 | 0.12 |
| Gabon | Afrotropics | 21.41 | 0.39 | 0.02 |
| Bangladesh | Indomalayan tropics | 10.45 | 0.36 | 0.03 |
| El Salvador | Neotropics | 1.98 | 0.33 | 0.17 |
| Belize | Neotropics | 1.67 | 0.31 | 0.19 |
| Suriname | Neotropics | 14.22 | 0.25 | 0.02 |
| Jamaica | Neotropics | 1.05 | 0.25 | 0.24 |
| Puerto Rico | Neotropics | 0.87 | 0.25 | 0.29 |
| Taiwan | Indomalayan tropics | 3.52 | 0.25 | 0.07 |
| Central African Republic | Afrotropics | 6.54 | 0.23 | 0.04 |
| Rwanda | Afrotropics | 1.35 | 0.15 | 0.11 |
| Argentina | Neotropics | 2.85 | 0.12 | 0.04 |
| Equatorial Guinea | Afrotropics | 2.61 | 0.11 | 0.04 |
| French Guiana | Neotropics | 8.14 | 0.08 | 0.01 |
| Bahamas | Neotropics | 0.44 | 0.07 | 0.15 |
| Burundi | Afrotropics | 1.39 | 0.06 | 0.04 |
| Trinidad and Tobago | Neotropics | 0.49 | 0.06 | 0.13 |
| Paraguay | Neotropics | 4.64 | 0.06 | 0.01 |
| Brunei | Indomalayan tropics | 0.57 | 0.05 | 0.08 |
| Togo | Afrotropics | 0.63 | 0.03 | 0.05 |
| Reunion | Afrotropics | 0.25 | 0.02 | 0.10 |
| Mauritius | Afrotropics | 0.16 | 0.02 | 0.14 |
| Martinique | Neotropics | 0.08 | 0.02 | 0.26 |
| Dominica | Neotropics | 0.06 | 0.02 | 0.32 |
| Comoros | Afrotropics | 0.15 | 0.02 | 0.11 |
| Guadeloupe | Neotropics | 0.07 | 0.01 | 0.19 |
| Zimbabwe | Afrotropics | 0.08 | 0.01 | 0.17 |
| Angola | Afrotropics | 1.14 | 0.01 | 0.01 |
| Hong Kong | Indomalayan tropics | 0.09 | 0.01 | 0.13 |
| São Tomé and Príncipe | Afrotropics | 0.09 | 0.01 | 0.13 |
| Singapore | Indomalayan tropics | 0.06 | 0.01 | 0.13 |
| Saint Lucia | Neotropics | 0.06 | 0.01 | 0.12 |
| South Sudan | Afrotropics | 0.48 | 0.01 | 0.01 |
| Japan | Indomalayan tropics | 0.06 | 0.01 | 0.10 |
| Somalia | Afrotropics | 6.78 | 0.01 | 0.00 |
| Grenada | Neotropics | 0.03 | 0.00 | 0.16 |
| Saint Vincent and the Grenadines | Neotropics | 0.02 | 0.00 | 0.19 |
| Cayman Islands | Neotropics | 0.01 | 0.00 | 0.32 |
| Mayotte | Afrotropics | 0.04 | 0.00 | 0.10 |
| Palau | Indomalayan tropics | 0.04 | 0.00 | 0.09 |
| Zambia | Afrotropics | 2.31 | 0.00 | 0.00 |
| Montserrat | Neotropics | 0.01 | 0.00 | 0.25 |
| Antigua and Barbuda | Neotropics | 0.01 | 0.00 | 0.15 |
| Virgin Islands, U.S. | Neotropics | 0.01 | 0.00 | 0.12 |
| Turks and Caicos Islands | Neotropics | 0.02 | 0.00 | 0.04 |
| Micronesia | Indomalayan tropics | 0.06 | 0.00 | 0.01 |
| Bonaire, Sint Eustatius and Saba | Neotropics | 0.00 | 0.00 | 0.32 |
| Saint Kitts and Nevis | Neotropics | 0.01 | 0.00 | 0.08 |
| Malawi | Afrotropics | 0.00 | 0.00 | 0.09 |
| Anguilla | Neotropics | 0.00 | 0.00 | 0.40 |
| Benin | Afrotropics | 0.15 | 0.00 | 0.00 |
| British Virgin Islands | Neotropics | 0.00 | 0.00 | 0.06 |
| Cape Verde | Afrotropics | 0.36 | 0.00 | 0.00 |
| British Indian Ocean Territory | Afrotropics | 0.00 | 0.00 | 0.00 |
| Seychelles | Afrotropics | 0.02 | 0.00 | 0.00 |
| American Samoa | Indomalayan tropics | 0.02 | 0.00 | 0.00 |
| Cocos Islands | Indomalayan tropics | 0.00 | 0.00 | 0.00 |
| Cook Islands | Indomalayan tropics | 0.01 | 0.00 | 0.00 |
| Christmas Island | Indomalayan tropics | 0.00 | 0.00 | 0.00 |
| Fiji | Indomalayan tropics | 1.78 | 0.00 | 0.00 |
| Guam | Indomalayan tropics | 0.05 | 0.00 | 0.00 |
| Kiribati | Indomalayan tropics | 0.02 | 0.00 | 0.00 |
| Macao | Indomalayan tropics | 0.00 | 0.00 | 0.00 |
| Maldives | Indomalayan tropics | 0.00 | 0.00 | 0.00 |
| Marshall Islands | Indomalayan tropics | 0.01 | 0.00 | 0.00 |
| Northern Mariana Islands | Indomalayan tropics | 0.04 | 0.00 | 0.00 |
| New Caledonia | Indomalayan tropics | 1.83 | 0.00 | 0.00 |
| Niue | Indomalayan tropics | 0.03 | 0.00 | 0.00 |
| Pakistan | Indomalayan tropics | 0.00 | 0.00 | 0.00 |
| French Polynesia | Indomalayan tropics | 0.27 | 0.00 | 0.00 |
| Solomon Islands | Indomalayan tropics | 2.53 | 0.00 | 0.00 |
| Tonga | Indomalayan tropics | 0.06 | 0.00 | 0.00 |
| Tuvalu | Indomalayan tropics | 0.00 | 0.00 | 0.00 |
| Vanuatu | Indomalayan tropics | 1.11 | 0.00 | 0.00 |
| Wallis and Futuna | Indomalayan tropics | 0.01 | 0.00 | 0.00 |
| Samoa | Indomalayan tropics | 0.27 | 0.00 | 0.00 |
| Paracel Islands | Indomalayan tropics | 0.00 | 0.00 | 0.00 |
| United States | Neotropics | 1.33 | 0.00 | 0.00 |
| Pitcairn Islands | Neotropics | 0.00 | 0.00 | 0.00 |
| US Minor Outlying Islands | Neotropics | 0.00 | 0.00 | 0.00 |
